# Supplementary material for: Criminality in men with Klinefelter's syndrome and XYY syndrome: a cohort study
Source: HighWire-hosted journal article supplement (doi:10.1136/bmjopen-2011-000650), 2012-01-01
Supplement: bmjopen-2011-000650-s1.pdf [file bmjopen-2011-000650-s1.pdf]

Convictions  
Klinefelter syndrome  
Excluding convictions 2 years  
before and after the diagnoses

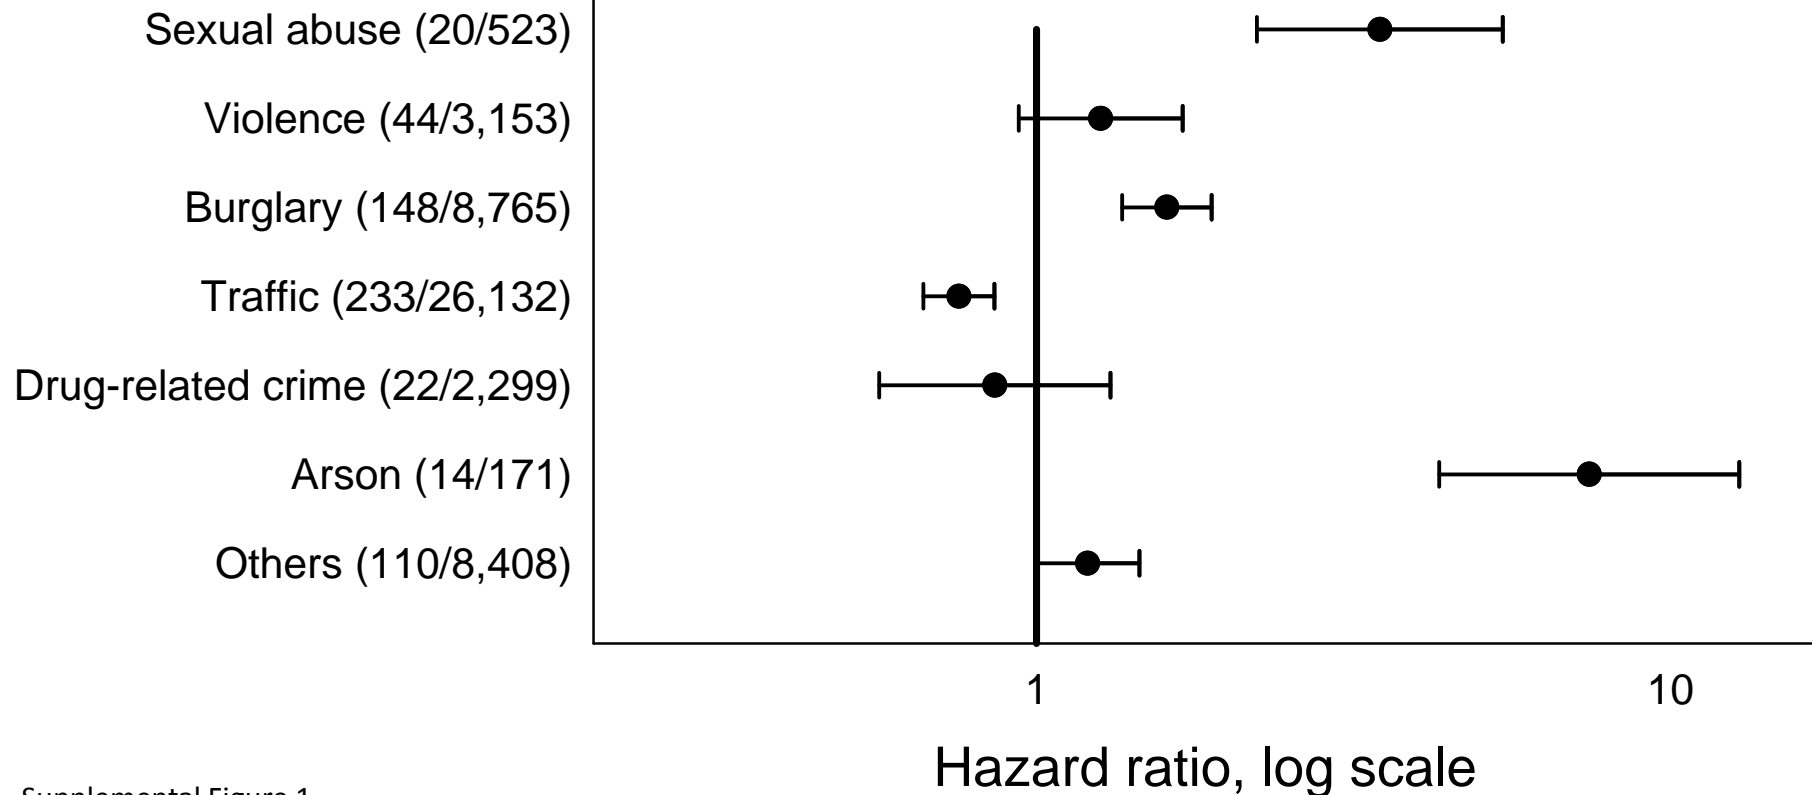

Supplemental Figure 1

Legend: Hazard ratios of convictions due to cause in Klinefelter syndrome compared to age-matched males (see Materials and Methods for details) after having excluded cases (and their controls) diagnosed 2 years before or after a conviction.

Actual numbers of offenders (KS/controls) are given in parentheses.

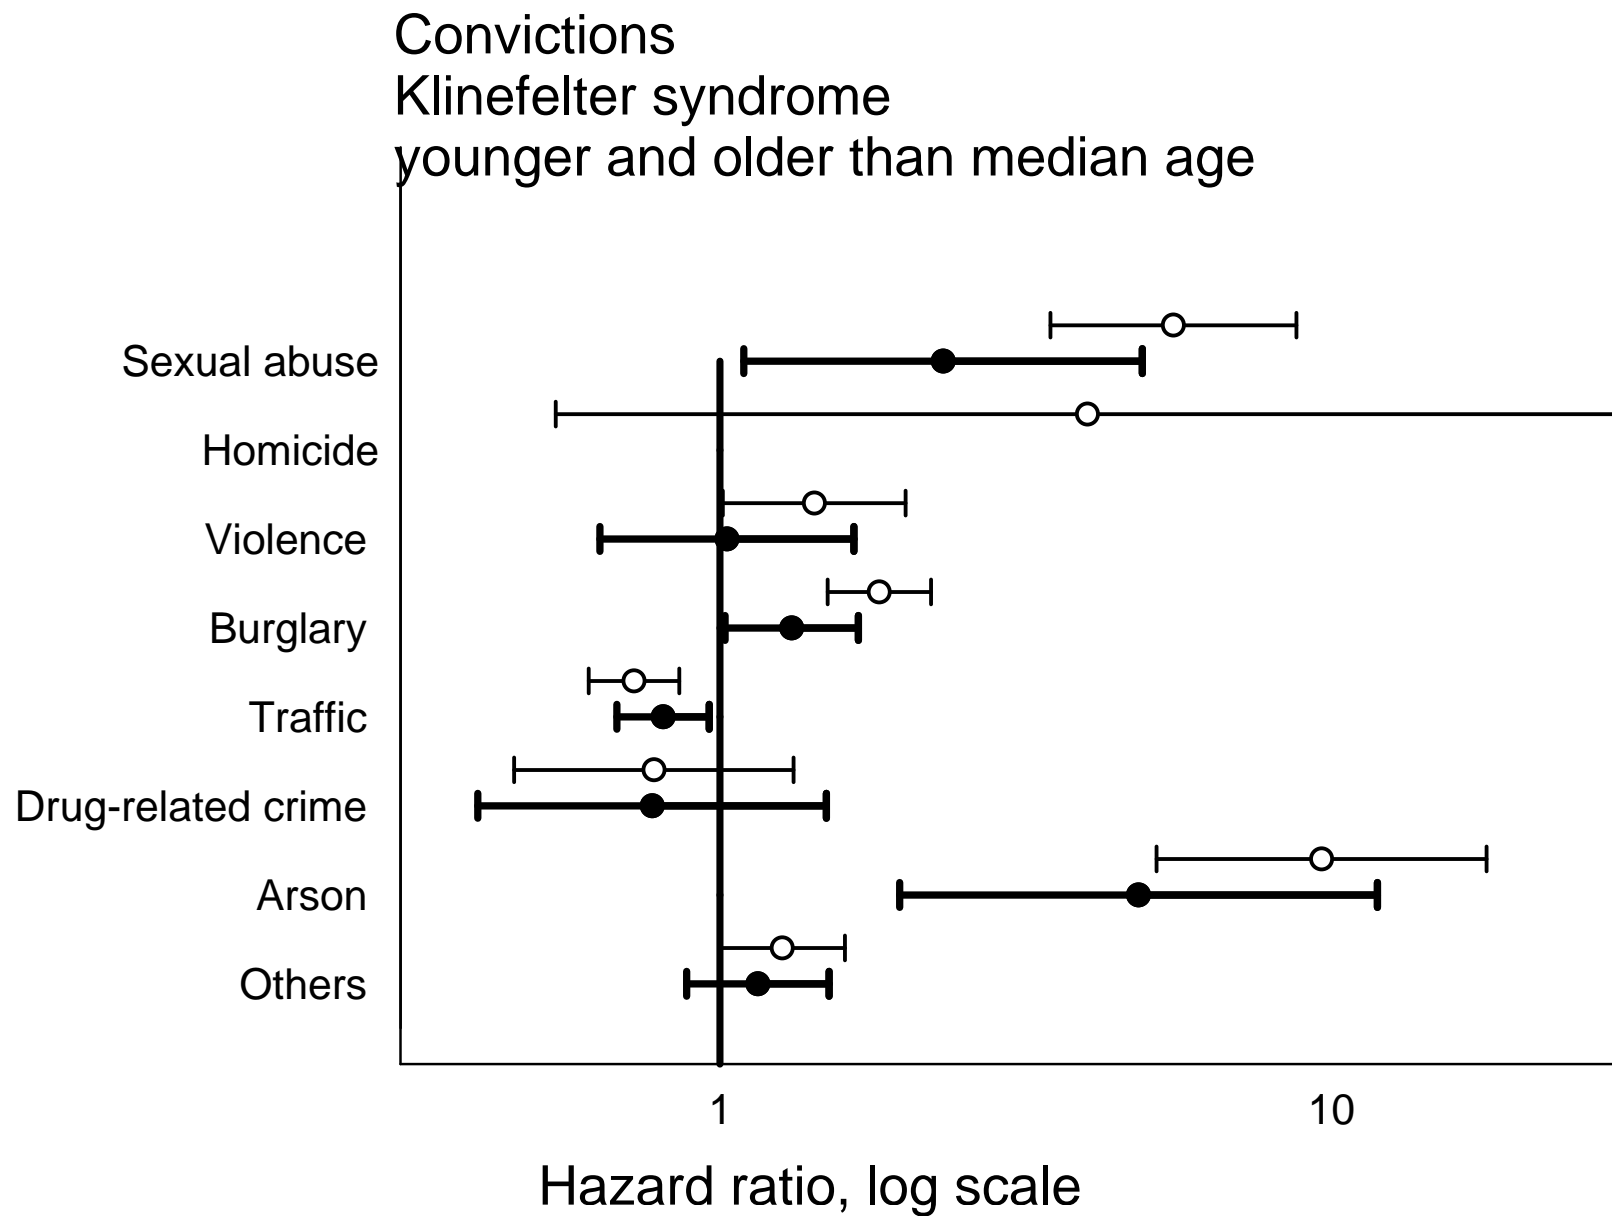

Supplemental Figure 2

Legend: Hazard ratios of convictions due to cause in Klinefelter syndrome compared to age-matched males after having divided cases (and their controls) in two depending on the median age at diagnosis into those diagnosed at a younger age (open circles) and those diagnosed at an older age (filled circles).

# Convictions 47,XYY syndrome excluding convictions 2 years before and after diagnosis

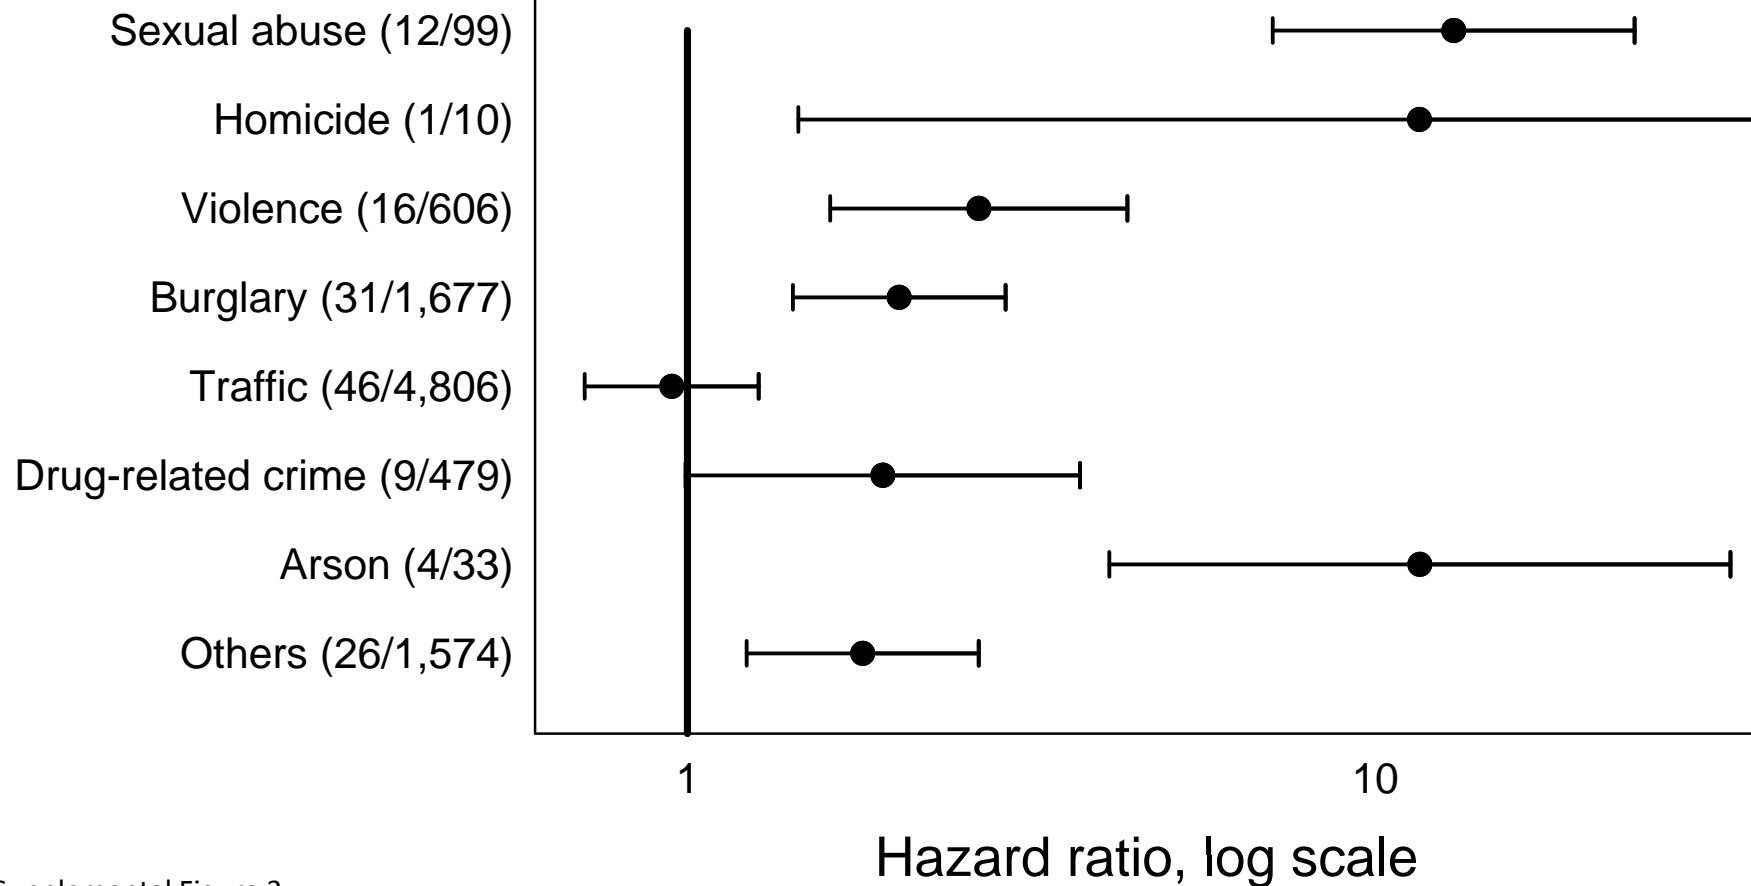

Supplemental Figure 3

Legend: Hazard ratios of convictions due to cause in 47,XYY syndrome compared to age-matched males (see Materials and Methods for details) after having excluded cases (and their controls) diagnosed 2 years before or after a conviction.

Actual numbers of offenders (47,XYY/controls) are given in parentheses.

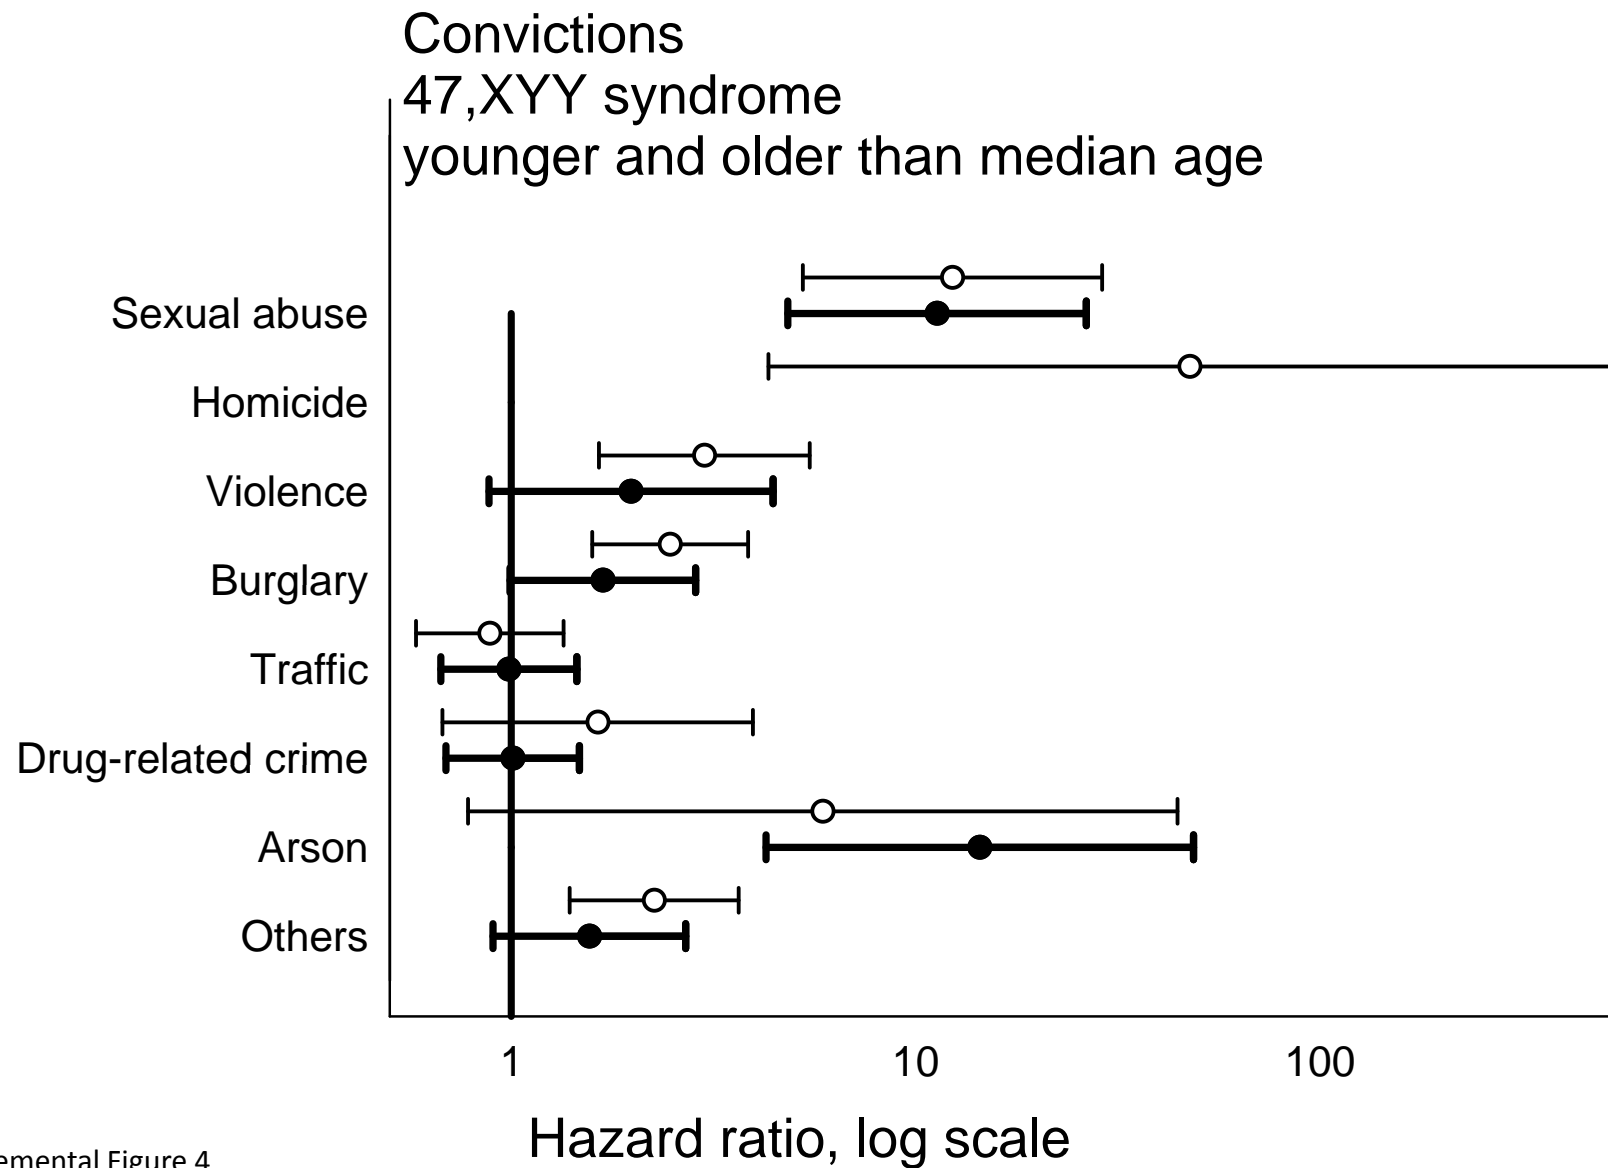

Supplemental Figure 4

Legend: Hazard ratios of convictions due to cause in 47,XYY syndrome compared to age-matched males after having divided cases (and their controls) in two depending on the median age at diagnosis into those diagnosed at a younger age (open circles) and those diagnosed at an older age (filled circles).
